# Supplementary material for: PCGF6-PRC1 suppresses premature differentiation of mouse embryonic stem cells by regulating germ cell-related genes
Source: eLife. 2017 Mar 17;6:e21064. doi: 10.7554/eLife.21064 (PMC5375644; doi:10.7554/eLife.21064)
Supplement: Figure 1—source data 1. — DOI: http://dx.doi.org/10.7554/eLife.21064.003 [file elife-21064-fig1-data1.xlsx]

## Sheet: Sheet1
	Empty vector IP
	Name	UniprotID	Score	Cov [%]
	Keratin, type II cytoskeletal 1	P04104	180	3.8
	Keratin, type II cytoskeletal 73	Q6NXH9	114	5.4
	Keratin, type II cytoskeletal 1b	Q6IFZ6	114	6.1
	Keratin, type II cytoskeletal 71	Q9R0H5	114	4.2
	Elongation factor 1-alpha 1	P10126	111	7.8
	Keratin, type II cytoskeletal 75	Q8BGZ7	97	8.3
	Keratin, type II cytoskeletal 5	Q922U2	97	9
	Propionyl-CoA carboxylase beta chain, mitochondrial	Q99MN9	94	3.9
	Methylcrotonoyl-CoA carboxylase subunit alpha, mitochondrial	Q99MR8	60	6
	Mitochondrial inner membrane protein	Q8CAQ8	60	5.4
	Endoplasmin	P08113	48	2.5
	Protein SET	Q9EQU5	46	8
	Stress-70 protein, mitochondrial	P38647	40	8.5
	Delta-1-pyrroline-5-carboxylate synthase	Q9Z110	39	2.6
	Keratin, type II cytoskeletal 2 epidermal	Q3TTY5	35	5.2
	Meiosis-specific nuclear structural protein 1	Q61884	33	3.3
	Phosphatidylinositol-glycan biosynthesis class F protein	O09101	31	4.1
	Ataxin-2-like protein	Q7TQH0	31	3.9
	Keratin, type II cytoskeletal 2 oral	Q3UV17	31	9.9
	Serine/threonine-protein phosphatase 6 regulatory ankyrin repeat subunit C	Q8BTI7	29	0.6
	Leucine-rich repeat-containing protein 66	Q8K0B3	29	0.7
	GrpE protein homolog 1, mitochondrial	Q99LP6	28	12.4
	Nidogen-2	O88322	26	1.6
	Coiled-coil domain-containing protein 25	Q78PG9	24	4.3
	Probable tRNA pseudouridine synthase 2	Q91WG3	24	4.2
	U4/U6.U5 tri-snRNP-associated protein 1	Q9Z315	22	3.8
	DNA/RNA-binding protein KIN17	Q8K339	19	3.1
	PCGF6 IP
	Name	UniprotID	Score	Cov [%]
	MAX gene-associated protein	A2AWL7	3827	22.4
	Polycomb group RING finger protein 6	Q99NA9	3685	68.8
	E3 ubiquitin-protein ligase RING2	Q9CQJ4	3046	45.5
	E3 ubiquitin-protein ligase RING1	O35730	1609	44.8
	Chromobox protein homolog 3	P23198	1321	51.9
	RING1 and YY1-binding protein	Q8CCI5	1181	45.6
	Chromobox protein homolog 1	P83917	617	13
	Keratin, type I cytoskeletal 10	P02535	560	11.2
	Keratin, type II cytoskeletal 5	Q922U2	559	8.1
	Keratin, type II cytoskeletal 1	P04104	444	7.7
	Lethal(3)malignant brain tumor-like protein 2	P59178	421	20.2
	Keratin, type I cytoskeletal 15	Q61414	311	12.6
	Keratin, type I cytoskeletal 14	Q61781	257	9.7
	Keratin, type I cytoskeletal 25	Q8VCW2	257	4
	Keratin, type I cytoskeletal 16	Q9Z2K1	257	8.7
	Keratin, type I cytoskeletal 28	A6BLY7	256	1.9
	Heat shock cognate 71 kDa protein	P63017	247	22.8
	Elongation factor 1-alpha 1	P10126	223	16.9
	Histone deacetylase 1	O09106	213	13.1
	Keratin, type II cytoskeletal 1b	Q6IFZ6	199	9.1
	YY1-associated factor 2	Q99LW6	182	25.7
	Keratin, type II cytoskeletal 73	Q6NXH9	179	5.6
	Keratin, type II cytoskeletal 71	Q9R0H5	172	4.6
	Keratin, type II cytoskeletal 74	Q6IFZ9	172	5.7
	Histone deacetylase 2	P70288	152	15.4
	Methylcrotonoyl-CoA carboxylase subunit alpha, mitochondrial	Q99MR8	129	9.5
	Keratin, type II cytoskeletal 2 epidermal	Q3TTY5	100	10.2
	Ataxin-2-like protein	Q7TQH0	100	5.5
	Propionyl-CoA carboxylase beta chain, mitochondrial	Q99MN9	87	5.4
	Keratin, type I cytoskeletal 13	P08730	81	6.9
	Keratin, type I cytoskeletal 19	P19001	81	6.9
	Keratin, type I cytoskeletal 17	Q9QWL7	81	4.8
	Methylcrotonoyl-CoA carboxylase beta chain, mitochondrial	Q3ULD5	74	6.7
	WD repeat-containing protein 5	P61965	70	10.2
	Lipoamide acyltransferase component of branched-chain alpha-keto acid dehydrogenase complex, mitochondrial	P53395	69	7.9
	GrpE protein homolog 1, mitochondrial	Q99LP6	63	16.6
	Coenzyme Q-binding protein COQ10 homolog B, mitochondrial	Q3THF9	63	5.8
	Ras-related protein Rab-11B	P46638	63	2.8
	Keratin, type II cytoskeletal 2 oral	Q3UV17	37	11.8
	Keratin, type II cytoskeletal 4	P07744	35	5
	Caspase recruitment domain-containing protein 11	Q8CIS0	33	1.4
	ATP-binding cassette sub-family A member 7	Q91V24	33	1.4
	Signal peptidase complex subunit 3	Q9D365	33	3.3
	Propionyl-CoA carboxylase alpha chain, mitochondrial	Q91ZA3	33	8.7
	T-complex protein 1 subunit zeta	P80317	32	1.9
	Calcium/calmodulin-dependent protein kinase type II subunit beta	P28652	31	14.8
	Calcium/calmodulin-dependent protein kinase type II subunit gamma	Q923T9	31	12.3
	DBF4-type zinc finger-containing protein 2 homolog	Q5SS00	30	1.4
	Endoplasmin	P08113	30	3.1
	Dual specificity testis-specific protein kinase 2	Q8VCT9	29	1.8
	Heat shock-related 70 kDa protein 2	P17156	29	11.5
	Protein FAM13C	Q9DBR2	28	2.7
	Nidogen-2	O88322	28	0.6
	Vinculin	Q64727	21	3.9
	Alpha-protein kinase 1	Q9CXB8	21	2.9
	PCGF6 + Benzonase IP
	Name	UniprotID	Score	Cov [%]
	MAX gene-associated protein	A2AWL7	3572	22.6
	Polycomb group RING finger protein 6	Q99NA9	3350	56.9
	E3 ubiquitin-protein ligase RING2	Q9CQJ4	2356	52.7
	RING1 and YY1-binding protein	Q8CCI5	1468	49.1
	E3 ubiquitin-protein ligase RING1	O35730	1295	40.4
	Chromobox protein homolog 3	P23198	784	39.3
	Chromobox protein homolog 1	P83917	463	13
	Lethal(3)malignant brain tumor-like protein 2	P59178	385	16.6
	YY1-associated factor 2	Q99LW6	260	25.7
	Elongation factor 1-alpha 1	P10126	251	14.5
	Histone deacetylase 1	O09106	225	11.4
	Histone deacetylase 2	P70288	220	12.9
	Methylcrotonoyl-CoA carboxylase subunit alpha, mitochondrial	Q99MR8	151	12.4
	Heat shock cognate 71 kDa protein	P63017	145	14.4
	Keratin, type II cytoskeletal 1	P04104	131	5.2
	Keratin, type II cytoskeletal 73	Q6NXH9	111	7.4
	Keratin, type I cytoskeletal 15	Q61414	110	5.8
	Propionyl-CoA carboxylase beta chain, mitochondrial	Q99MN9	99	2
	WD repeat-containing protein 5	P61965	98	12.6
	Keratin, type II cytoskeletal 75	Q8BGZ7	98	5.8
	Lipoamide acyltransferase component of branched-chain alpha-keto acid dehydrogenase complex, mitochondrial	P53395	90	7.1
	Transcription factor Dp-1	Q08639	87	3.7
	Keratin, type II cytoskeletal 74	Q6IFZ9	82	6.7
	Keratin, type II cytoskeletal 1b	Q6IFZ6	82	6.5
	Keratin, type I cytoskeletal 17	Q9QWL7	69	6.5
	Keratin, type I cytoskeletal 13	P08730	69	11.2
	Keratin, type I cytoskeletal 19	P19001	69	6.7
	Keratin, type I cytoskeletal 10	P02535	68	6.3
	Keratin, type I cytoskeletal 14	Q61781	68	6.4
	Keratin, type I cytoskeletal 16	Q9Z2K1	68	9.8
	Keratin, type I cytoskeletal 28	A6BLY7	67	1.9
	Methylcrotonoyl-CoA carboxylase beta chain, mitochondrial	Q3ULD5	59	6.2
	Glial fibrillary acidic protein	P03995	57	4.9
	Coenzyme Q-binding protein COQ10 homolog B, mitochondrial	Q3THF9	56	5.8
	Ras-related protein Rab-11B	P46638	56	2.8
	GrpE protein homolog 1, mitochondrial	Q99LP6	42	16.6
	Propionyl-CoA carboxylase alpha chain, mitochondrial	Q91ZA3	39	5
	Keratin, type II cytoskeletal 2 epidermal	Q3TTY5	36	10.2
	Cell cycle progression protein 1	Q640L3	34	1.1
	ATP-binding cassette sub-family A member 7	Q91V24	33	3.6
	Signal peptidase complex subunit 3	Q9D365	33	3.3
	Probable tRNA pseudouridine synthase 2	Q91WG3	31	4.2
	HEAT repeat-containing protein 8	A2AVR2	29	2.6
	Ataxin-2-like protein	Q7TQH0	29	2.7
	Heterogeneous nuclear ribonucleoprotein K	P61979	27	11.4
	Protein diaphanous homolog 3	Q9Z207	27	2
	Coiled-coil domain-containing protein 25	Q78PG9	27	4.3
	Fibrous sheath-interacting protein 2	A2ARZ3	26	2.5
	Vinculin	Q64727	26	4.2
	Alpha-protein kinase 1	Q9CXB8	26	2.9
	Protein SHQ1 homolog	Q7TMX5	26	2.3
	Protein FAM192A	Q91WE2	26	2.8
	Protein SET	Q9EQU5	24	8
	Ubiquitin carboxyl-terminal hydrolase 38	Q8BW70	24	1.1
	DNA/RNA-binding protein KIN17	Q8K339	23	3.1
	Plectin	Q9QXS1	20	1.7
	Synaptotagmin-13	Q9EQT6	20	3.8
	U4/U6.U5 tri-snRNP-associated protein 1	Q9Z315	19	2.4
	Mitogen-activated protein kinase kinase kinase 6	Q9WTR2	19	3.9
