# Supplementary figures and images for: PCGF6-PRC1 suppresses premature differentiation of mouse embryonic stem cells by regulating germ cell-related genes
Source: eLife journal article supplement (doi:10.7554/elife.21064), 2017-03-17

Figure 4–Figure Supplement 1

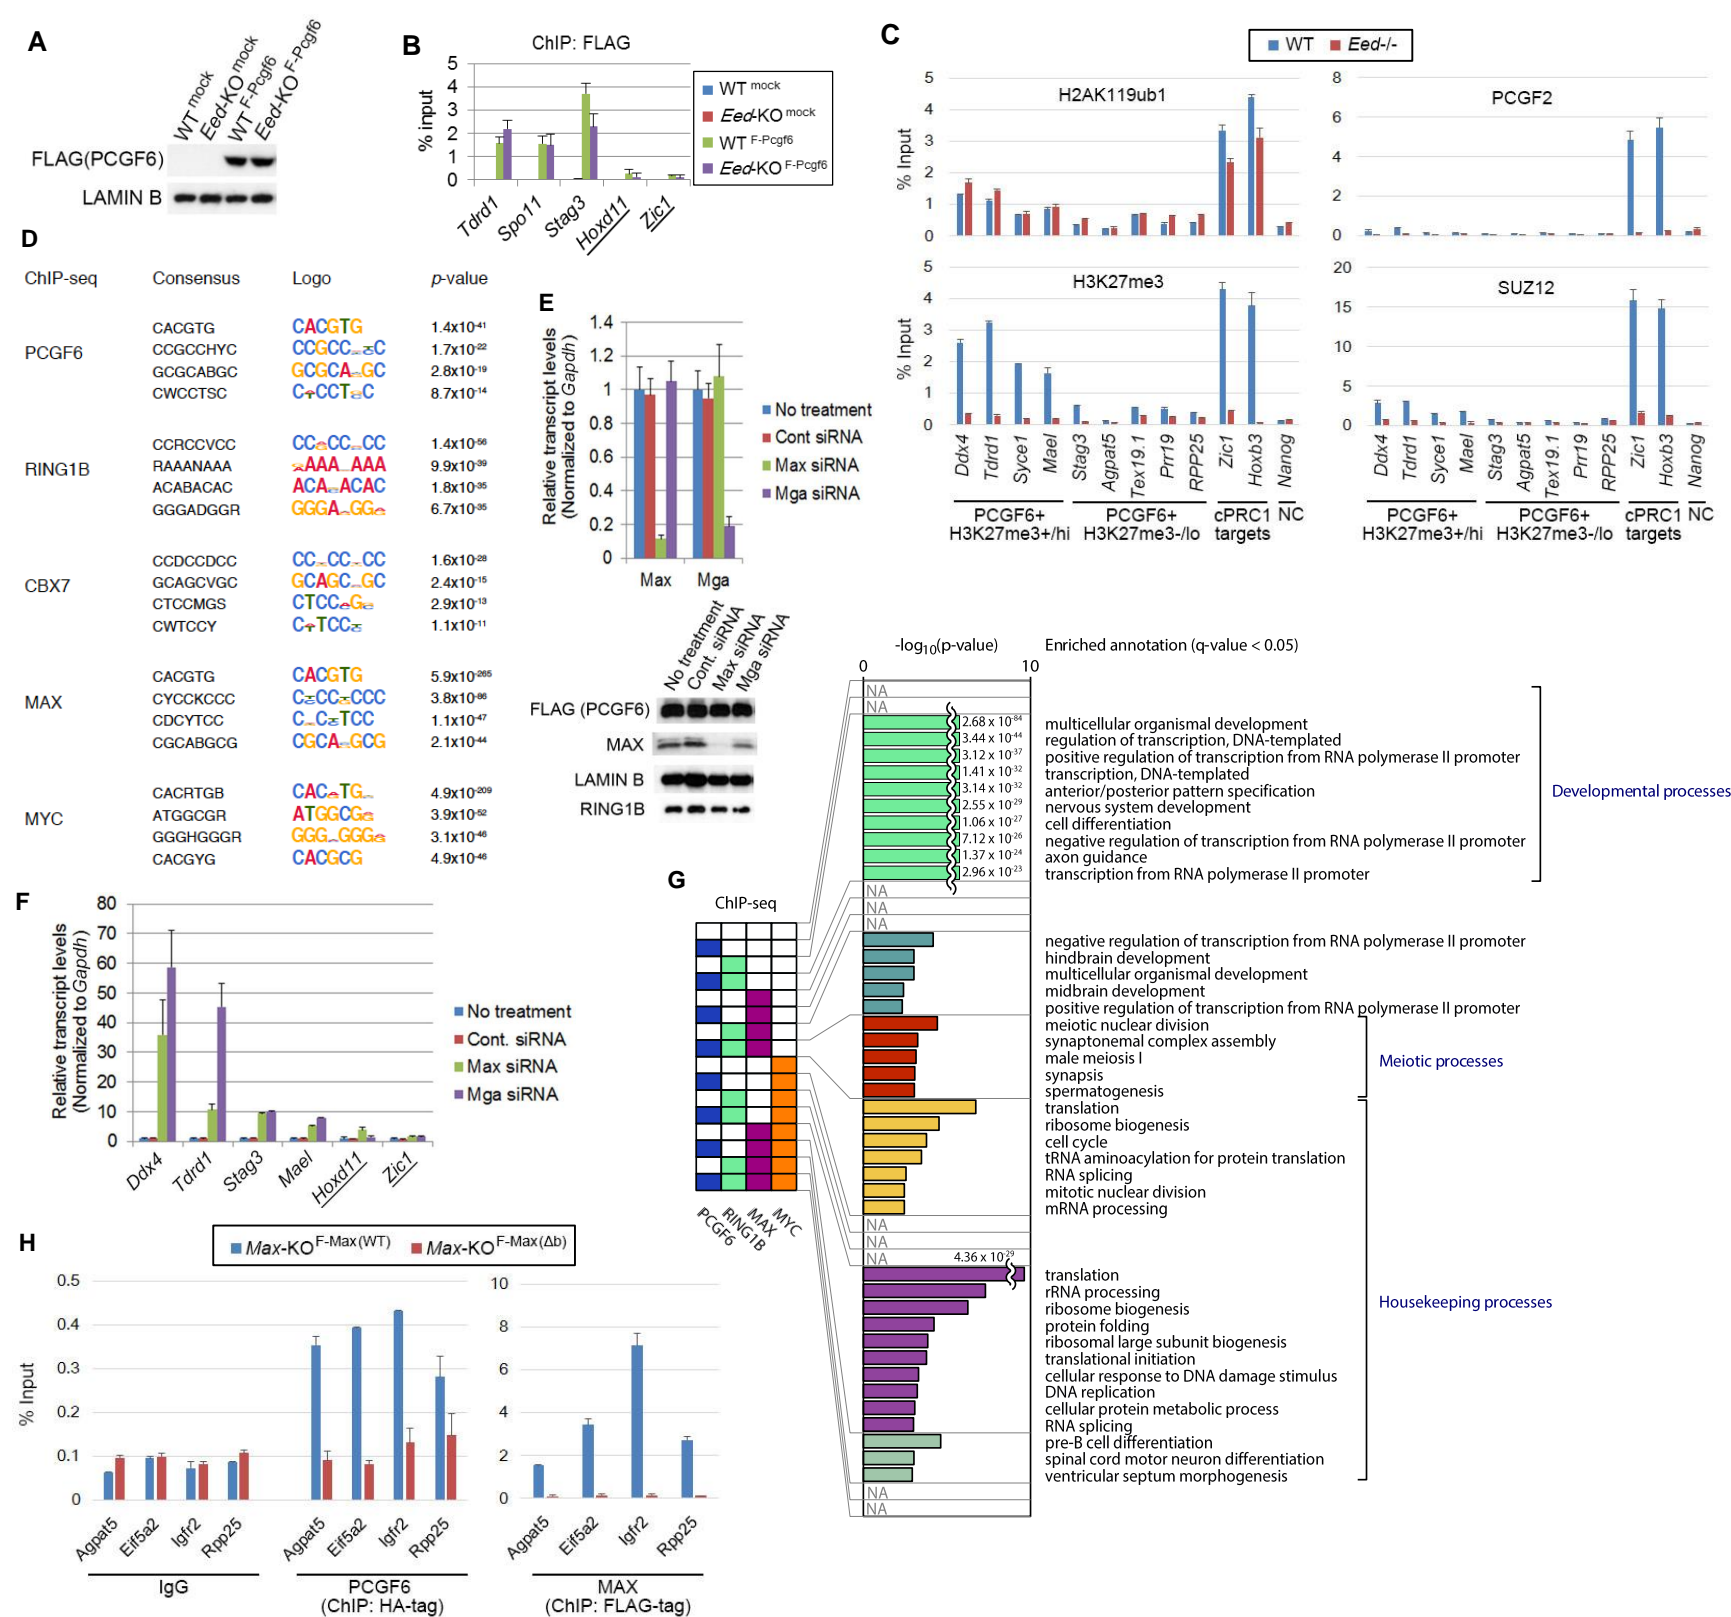

Supplement: supp [file elife_poa_e21064_Figure_4_figure_supplement_1.pdf › elife_poa_e21064_Figure_4_figure_supplement_1.pdf]
